# Supplementary material for: Hierarchical porous ZSM-5-promoted FeSiMn catalyst for gasoline selectivityviaFischer–Tropsch synthesis: effect of acid sites
Source: Royal Society of Chemistry journal article supplement (doi:10.1039/d3nj00098b), 2023-01-01
Supplement: d3nj00098b1.pdf [file d3nj00098b1.pdf]

**Hierarchical porous ZSM-5 promoted FeSiMn catalyst for gasoline selectivity  
via Fischer-Tropsch synthesis: Effect of acid sites**

Yulan Zhang\*, Xizhu Lin

*New Journal of Chemistry*

**Electronic Supplementary Information**

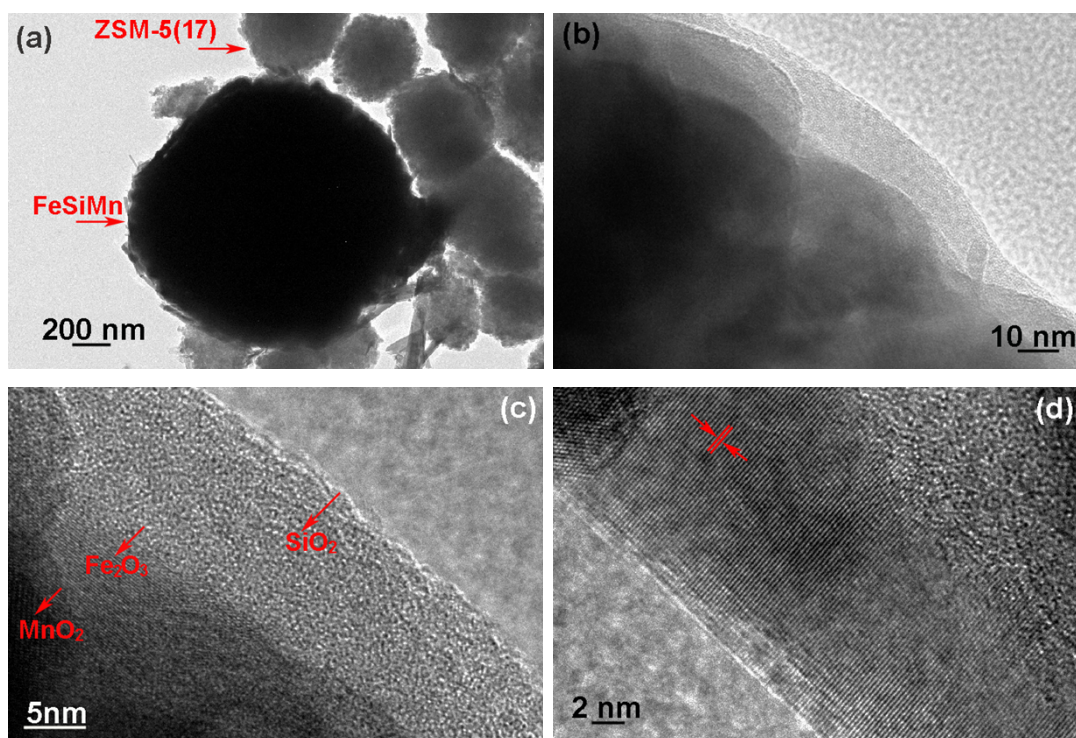

**Fig. S1** Electron microscopy characterization of the FeSiMn+ZSM-5(17) catalyst. (a) TEM image, (b) high-magnification TEM image, (c) and (d) HRTEM images.

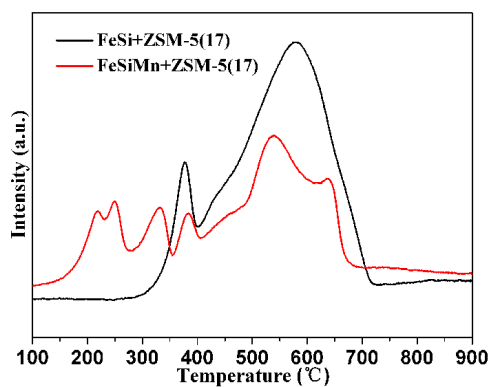

**Fig. S2** H<sub>2</sub>-TPR of the synthesized samples.

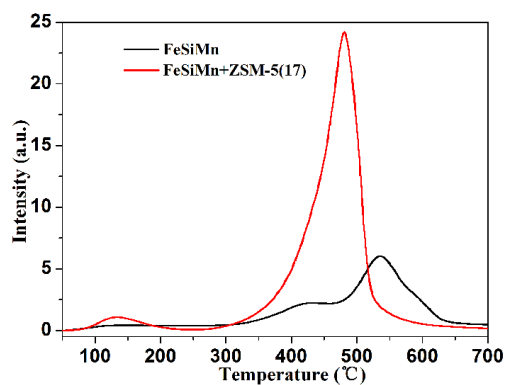

**Fig. S3** CO-TPD of the FeSiMn and FeSiMn+ZSM-5(17)

**Table S1** Catalyst performance and product distribution in FTS

| Catalyst                         | CO Conversion (%) | Hydrocarbons Selectivity (%) |                                |                  |
|----------------------------------|-------------------|------------------------------|--------------------------------|------------------|
|                                  |                   | CH <sub>4</sub>              | C <sub>2</sub> -C <sub>4</sub> | C <sub>5</sub> + |
| FeMn-HZSM-5 <sup>30</sup>        | 69.9              | 24.1                         | 41.6                           | 34.3             |
| FeZnNa@0.6-NaZSM-5 <sup>31</sup> | 86.6              | 10.1                         | 36.2                           | 52.6             |
| Fe@NaZ5 <sup>32</sup>            | 60.4              | 18.0                         | 28.9                           | 52.5             |
| FeSiMn+ZSM-5(15)                 | 73.1              | 13.5                         | 24.8                           | 61.7             |
